# Supplementary material for: Reduced graphene oxide–CdS nanocomposites with enhanced visible-light photoactivity synthesized using ionic-liquid precursors
Source: Royal Society of Chemistry journal article supplement (doi:10.1039/c4nj00152d), 2014-01-01
Supplement: c4nj00152d1.pdf [file c4nj00152d1.pdf]

Supporting information:

# Reduced Graphene Oxide-CdS Nanocomposites with Enhanced Visible-light Photoactivity Synthesized Using Ionic-liquid Precursors

Nan Jiang<sup>a, †</sup>, Zhiliang Xiu<sup>a, d, †</sup>, Zheng Xie<sup>\*, b</sup>, Hongyun Li<sup>c</sup>, Gang Zhao<sup>a</sup>, Wenpeng Wang<sup>a</sup>, Yongzhong Wu<sup>\*, a</sup>, Xiaopeng Hao<sup>a</sup>

<sup>a</sup>State Key Laboratory of Crystal Materials, Shandong University, Jinan 250100, P.R.  
China.

<sup>b</sup>Technical Institute of Physics and Chemistry Chinese Academy of Sciences, Beijing  
100190, P. R. China

<sup>c</sup>High School Affiliated to Shandong University, Shandong University, Jinan 250100,  
P.R. China

<sup>d</sup>School of Materials Science and Engineering, Qilu University of Technology, Jinan  
250353, P. R. China.

<sup>†</sup>These two authors contribute equally.

E-mail: wuyz@sdu.edu.cn; ; zhengxie@mail.ipc.ac.cn

Table S1 BET specific area of the pure CdS and the RGO/CdS nanocomposites

|                                                       | RGO weight content (wt. %) |      |      |      |      |
|-------------------------------------------------------|----------------------------|------|------|------|------|
| Sample                                                | 0                          | 1%   | 5%   | 10%  | 15%  |
| $S_{\text{BET}}$ ( $\text{m}^2 \cdot \text{g}^{-1}$ ) | 5.9                        | 18.0 | 18.5 | 28.3 | 36.4 |

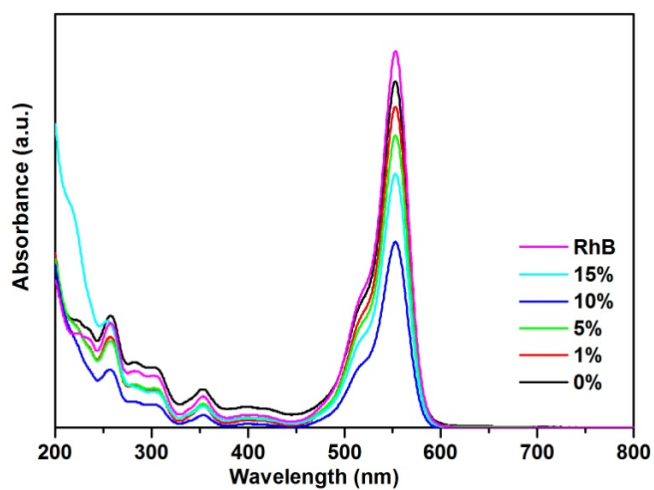

Figure S1 Variation of absorbance after adsorption-desorption equilibrium for the pure CdS and the RGO/CdS nanocomposites with different RGO weight ratios
